# Supplementary material for: Xylose fermentation to ethanol by new Galactomyces geotrichum and Candida akabanensis strains
Source: PeerJ. 2018 Apr 27;6:e4673. doi: 10.7717/peerj.4673 (PMC5926554; doi:10.7717/peerj.4673)
Supplement: Data S1 [file peerj-06-4673-s001.xlsx]

## Sheet: AR - teste
	Curva AR
0	0.199	0
0.2	0.115	-0.084
0.4	0.263	0.064
0.6	0.306	0.107
0.8	0.357	0.158
1	0.436	0.237
	0	0
	0.2
	0.4	0.064
	0.6	0.107
	0.8	0.158
	1	0.237

## Sheet: Figure 3
			Figure 3: Progress curve (cell growth vs carbohydrate consumption) of G. geotrichum UFVJM-R10 (A), G. geotrichum UFVJM-R150 (B) and C. akabanensis UFVJM-R131 (C)
		UFVJM R10				UFVJM R131				UFVJM R150
	hours	Xylose g L-1	SD		hours	Xylose g L-1	SD		hours	Xylose g L-1	SD
	0	14.71	3.2		0	15.4	2.43		0	17.55	1.77
	12	10.48	2.49		12	9.96	2.56		12	10.44	1.09
	24	8.3	1.74		24	8.53	2.77		24	8.88	1.71
	36	5.06	1.16		36	4.18	1.01		36	6.5	0.7
	48	1.94	0.43		48	0.09	0.01		48	2.75	0.22
	60	0.04	0.01		60	0.05	0.00647924		60	0.05	0.01
	72	0.1	0.07		72	0.12	0.09		72	0.13	0.01
						Cell count (Neubauer chamber) Cells mL-1
				UFVJM R10					UFVJM R131					UFVJM R150
hours	1	2	3	Average	SD	1	2	3	Average	SD	1	2	3	Average	SD
0	1.485e+06	990000	1.925e+06	1.46667e+06	467770	2585000	1.98e+06	1155000	1.90667e+06	717815	440000	495000	440000	458333	31754.3
12	10065000	1.232e+07	39050000	2.04783e+07	1.6123e+07	160160000	164710000	150150000	158340000	7.44867e+06	6.325e+06	20625000	5115000	1.06883e+07	8.62665e+06
24	9750000	4615000	8385000	7.58333e+06	2.65971e+06	337820000	360680000	285750000	3.28083e+08	3.84022e+07	3100000	3875000	7750000	4.90833e+06	2.49128e+06
36	28045000	15265000	40115000	2.78083e+07	1.24267e+07	529210000	549780000	480590000	519860000	35530000	55380000	66385000	46860000	5.62083e+07	9.78882e+06
48	44625000	41250000	48000000	44625000	3375000	697500000	849375000	566250000	704375000	1.41688e+08	44625000	39750000	51750000	45375000	6.03505e+06
60	52900000	51750000	53475000	5.27083e+07	878327	898125000	860625000	888750000	882500000	1.95156e+07	84525000	71300000	87975000	8.12667e+07	8.80207e+06
72	138575000	132250000	103500000	124775000	1.86941e+07	989000000	1072375000	994750000	1.01871e+09	4.65655e+07	119025000	108675000	124200000	117300000	7.90494e+06
96	129950000	115575000	155250000	1.33592e+08	2.00866e+07	963125000	1009125000	1058000000	1.01008e+09	4.74448e+07	138000000	118450000	131100000	1.29183e+08	9.91493e+06
uX
LN(X1)-LN(X0)	1.91365	2.52127	3.00992	2.48161		4.12645	4.42109	4.86753	4.47169		2.66549	3.7297	2.45316	2.94945
(LN(X1)-LN(X0))/(t1-t0)	0.159471	0.210106	0.250826	0.206801	0.0457674	0.343871	0.368424	0.405628	0.372641	0.0310938	0.222124	0.310808	0.20443	0.245787	0.0570006

## Sheet: Figure 4
	Figure 4: Cell growth pattern of three selected D-xylose fermenting strains expressed in dry weigth.
			UFVJM-10R
Hours	DW-1 (gL-1)	DW-2 (gL-1)	DW-3 (gL-1)	Average	Stand. Desv.		Hours	UFVJM - R10	SD	UFVJM - R131	SD	UFVJM - R150	SD
0	1.92031	1.74	2.60113	2.08714	0.454159		0	2.08714	0.454159	0.0381333	0.0143563	1.21	0.034641
12	7.23891	8.02053	14.1882	9.81588	3.80666		12	9.81588	3.80666	3.1668	0.148973	5.36683	0.311621
24	7.12214	4.76983	6.58942	6.16046	1.23343		24	6.16046	1.23343	6.56167	0.768044	4.79199	1.35639
36	12.0623	8.93014	14.3764	11.7896	2.73335		36	11.7896	2.73335	10.3972	0.7106	16.1735	0.660709
48	15.1462	14.5742	15.6964	15.1389	0.561162		48	15.1389	0.561162	14.0875	2.83375	15.7156	0.569393
60	16.4611	16.285	16.5484	16.4315	0.13417		60	16.4315	0.13417	17.65	0.390312	20.2897	1.09299
72	26.3819	25.784	22.8641	25.01	1.88228		72	25.01	1.88228	20.3742	0.931311	24.3016	0.808059
96	25.5631	24.1349	27.8951	25.8643	1.89812		96	25.8643	1.89812	20.2017	0.948895	25.4764	0.965609
LN(X1)-LN(X0)	1.32699	1.52812	1.69647	1.51719
(LN(X1)-LN(X0))/(t1-t0)	0.110582	0.127343	0.141372	0.126433	0.0154152
			UFVJM-150R
Hours	DW-1 (gL-1)	DW-2 (gL-1)	DW-3 (gL-1)	Average	Stand. Desv.
0	1.19	1.25	1.19	1.21	0.034641
12	5.67845	5.36683	5.05521	5.36683	0.311621
24	3.74545	4.30612	6.3244	4.79199	1.35639
36	16.8343	16.1735	15.5128	16.1735	0.660709
48	15.1462	15.7156	16.285	15.7156	0.569393
60	20.7047	19.05	21.1144	20.2897	1.09299
72	24.4854	23.4174	25.0019	24.3016	0.808059
96	26.3281	24.4274	25.6738	25.4764	0.965609
LN(X1)-LN(X0)	1.56273	1.45709	1.44647	1.48876
(LN(X1)-LN(X0))/(t1-t0)	0.130227	0.121424	0.120539	0.124063	0.0053562
			UFVJM-131R
Hours	DW-1 (gL-1)	DW-2 (gL-1)	DW-3 (gL-1)	Average	Stand. Desv.
0	0.0517	0.0396	0.0231	0.0381333	0.0143563
12	3.2032	3.2942	3.003	3.1668	0.148973
24	6.7564	7.2136	5.715	6.56167	0.768044
36	10.5842	10.9956	9.6118	10.3972	0.7106
48	13.95	16.9875	11.325	14.0875	2.83375
60	17.9625	17.2125	17.775	17.65	0.390312
72	19.78	21.4475	19.895	20.3742	0.931311
96	19.2625	20.1825	21.16	20.2017	0.948895
LN(X1)-LN(X0)	4.12645	4.42109	4.86753	4.47169
(LN(X1)-LN(X0))/(t1-t0)	0.343871	0.368424	0.405628	0.372641	0.0310938

## Sheet: Process Parameters
	Y p/x = g product/ g de cell
Sample	Ethanol g/L	Xf-Xi g/L	Y p/x	Y p/x average	Standar Deviation
UFVJM R10/1	4.83761	18.32	0.264062	0.317962	0.0504592
UFVJM R10/2	5.24786	16.11	0.325752
UFVJM R10/3	4.99145	13.71	0.364074
UFVJM R131/1	5.1453	19.21	0.267845	0.254237	0.0147637
UFVJM R 131/2	5.16239	20.14	0.256325
UFVJM R131/3	5.04274	21.14	0.23854
UFVJM R150/1	5.1453	20.65	0.249167	0.231998	0.0225832
UFVJM R150/2	5.04274	24.43	0.206416
UFVJM R150/3	4.95726	20.62	0.240411
	Y p/s = g ethanol/ g consumed substrate
Sample	Ethanol g/L	Consumed RS g/L	Y x/s	Y p/s average	SD
UFVJM R10/1	4.83761	11.2546	0.429835	0.354632	0.0729778
UFVJM R10/2	5.24786	14.9958	0.349955
UFVJM R10/3	4.99145	17.5691	0.284105
UFVJM R131/1	5.1453	16.3889	0.31395	0.341056	0.0570003
UFVJM R131/2	5.16239	17.0563	0.302667
UFVJM R131/3	5.04274	12.4037	0.406551
UFVJM R150/1	5.1453	19.3893	0.265368	0.291345	0.0234375
UFVJM R150/2	5.04274	16.9355	0.297761
UFVJM R150/3	4.95726	15.9446	0.310906
Qp = g ethanol L-1 / fermentation time
Sample	Ethanol g/L	Qp	Qp Average	SD
UFVJM R10/1	4.83761	0.067189	0.0698006	0.00287853
UFVJM R10/2	5.24786	0.072887
UFVJM R10/3	4.99145	0.0693257
UFVJM R131/1	5.1453	0.0714625	0.0710668	0.000898846
UFVJM R131/2	5.16239	0.0716999
UFVJM R131/3	5.04274	0.070038
UFVJM R150/1	5.1453	0.0714625	0.0701171	0.00130759
UFVJM R150/2	5.04274	0.070038
UFVJM R150/3	4.95726	0.0688509
